# Supplementary material for: Nickel Hollow Spheres Concatenated by Nitrogen‐Doped Carbon Fibers for Enhancing Electrochemical Kinetics of Sodium–Sulfur Batteries
Source: PubMed Central journal article supplement (PMC7029643; doi:10.1002/advs.201902617), 2019-12-23
Supplement: ADVS-7-1902617-s001.pdf [file ADVS-7-1902617-s001.pdf]

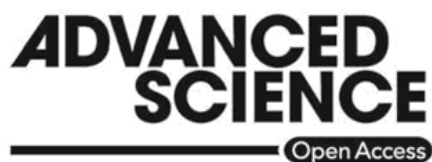

## Supporting Information

for *Adv. Sci.*, DOI: 10.1002/adv.201902617

**Nickel Hollow Spheres Concatenated by Nitrogen-Doped Carbon Fibers for Enhancing Electrochemical Kinetics of Sodium–Sulfur Batteries**

*Bingshu Guo, Wenyan Du, Tingting Yang, Jianhua Deng, Dingyu Liu, Yuruo Qi,\* Jian Jiang, Shu-Juan Bao, and Maowen Xu\**

## Supporting Information

### **Nickel hollow spheres concatenated by nitrogen-doped carbon fibers for enhancing electrochemical kinetics of sodium-sulfur batteries**

*Bingshu Guo, Wenyan Du, Tingting Yang, Jianhua Deng, Dingyu Liu, Yuruo Qi\*, Jian Jiang, Shu-Juan Bao, and Maowen Xu\**

#### **Experimental Section**

All chemical reagents are analytically pure and do not require further purification.

*Synthesis of NiO hollow spheres.* The Ni-MOF precursors were first prepared by our previously reported method.<sup>[1]</sup> Specifically, 2.0 mmol Ni(NO<sub>3</sub>)<sub>2</sub>•6H<sub>2</sub>O and 2.0 mmol 1,3,5-benzenetricarboxylic acid (H<sub>3</sub>BTC) were mixed and dissolved in 60 mL N,N-dimethylformamide (DMF) solution with continuous stirring for 30 min. Then, the green transparent solution was transferred into a 100 mL Teflon-lined stainless steel autoclave and heated at 150 °C for 12 h. After cooling down to room temperature, the products were collected by filtration and dried at 60 °C. Afterwards, the NiO hollow spheres were obtained by annealing of as-prepared Ni-MOF at 500 °C under an air atmosphere for 40 min with a heating rate of 1 °C/min.

*Synthesis of Ni-NCFs networks.* Firstly, the NiO-PAN was prepared via a facile electrospinning process. Typically, 500 mg NiO hollow spheres were dispersed into 6 mL DMF solution by ultrasonic for 10 min. Then 500 mg PAN (MW = 150000) was added into the dispersion solution under magnetic stirring for 12 h to obtain the precursor solution. Next, the mixture solution was sucked into a 5 mL plastic syringe with a blunt tip needle and started to spinning at 30 kV onto a collector covered with aluminium foil. The flow rate and distance between needle and the receiver were kept 0.0008 mm s<sup>-1</sup> and 18 cm, respectively. After drying at 60 °C, the NiO-PAN precursors were first pre-oxidized at 280 °C and pressed into a small round discs with the diameter about 1.3 cm before pyrolysing at 600 °C under Ar/H<sub>2</sub> atmosphere to achieve Ni-NCFs networks. For contrast, the pure NCFs were prepared through the same process, but without adding NiO hollow sphere.

*Synthesis of S@Ni-NCFs composite.* Firstly, dissolving a certain amount of sulfur powder into carbon disulfide (CS<sub>2</sub>) solution obtained a mixture with a concentration of 1.0 mg mL<sup>-1</sup>. Then, the S solution was dropped on the Ni-NCFs pieces by pipette and heated at 155 °C for 12 h under Ar atmosphere after evaporation of CS<sub>2</sub>. Moreover, the S@NCFs composite could

be prepared in the same way for comparing with the same mass loading of sulfur. Finally, in order to detect the sodium storage property of nickel sulfide in the S@Ni-NCFs composite, sulfur was removed from S@Ni-NCFs by using CS<sub>2</sub> solution. The products were labeled as Ni-NCFs/S.

*Preparation of Na<sub>2</sub>S<sub>6</sub> solution.* 320 mg of S and 156 mg of sodium sulfide (Na<sub>2</sub>S) were mixed and added into 10 mL tetraglyme (TEGDME) solvent. Then, the suspension was stirred at 80 °C for 6 h to get a reddish-brown Na<sub>2</sub>S<sub>6</sub> solution.

### **Material Characterization**

The morphologies of the samples were investigated by field-emission scanning microscope (FESEM, JSM-7800F, Japan) and transmission electron microscopy (TEM, JEM-2100, Japan). The EDS spectroscopy attached to FESEM was employed to record the elemental distribution. The crystal structures were detected through powder X-ray diffraction (XRD, MAXima-X XRD-7000) with Cu K $\alpha$  radiation ( $\lambda = 1.5406 \text{ \AA}$ ). The sulfur and carbon contents in the prepared composites were determined by Thermogravimetric analyzer (TGA, Q50, USA). The BET specific surface area and pore structure were tested by Brunauer-Emmett-Teller method (BET, Quantachrome Instruments, USA). The Thermo Scientific ESCALAB 250Xi electron spectrometer was applied to collect the X-ray photoelectron spectroscopy (XPS) spectra. In addition, ex-situ Raman was recorded by using Invia ReFl (Renishaw, UK) from 100 to 3000 cm<sup>-1</sup>, while the in-situ Raman was recorded by Lab-RAM HR Evolution (Horiba, EL-CELL in Germany) Raman microscope with a computer controller (CHI 660D).

### **Assembly and measurement of Na-S batteries**

All electrochemical measurements were studied at room temperature by assembling CR2032 coin cells in an argon glove-box. The S@Ni-NCFs and S@NCFs wafers with an area load of about 0.5 ~ 0.7 mg cm<sup>-2</sup> were directly used as working electrodes without adding any conductive additives or PVDF binder. In this system, the sodium foil was served as both the counter and reference electrode, and the glass fiber membrane (Whatman GF/A) was acted as the separator. Meanwhile, 1 M NaClO<sub>4</sub> dissolved in tetraethylene glycol dimethyl ether (TEGDME) was used as the electrolyte and the dosage was 90  $\mu$ L. After stewing for 8 h, the coin cells started galvanostatically charging and discharging within the voltage ranging from 0.5 to 2.8 V on a Land cycler (1C = 1675 mAh g<sup>-1</sup>, Wuhan Kingnuo Electronic Co, China). Cyclic voltammograms (CV) curves were performed at a scan rate of 0.1 mV s<sup>-1</sup> using Arbin Instruments. Electrochemical impedance spectroscopy (EIS) was tested by Zahner electrochemical workstation.

### Assembly and measurement of symmetrical batteries

Two identical disk electrodes (Ni-NCFs or NCFs) without sulfur load were both used as anode and cathode for assembling into a standard CR2032 coin cell. Among it, the glass fiber membrane was employed as separator, then 40  $\mu\text{L}$  of  $\text{Na}_2\text{S}_6$  ( $0.2 \text{ mol L}^{-1}$ ) and 50  $\mu\text{L}$  of blank electrolyte (1 M  $\text{NaClO}_4$  in TEGDME) were added. The CV curves were performed at a scan rate of  $50 \text{ mV s}^{-1}$  between  $-0.8 \text{ V}$  and  $0.8 \text{ V}$ , while the EIS were measured on Zahner electrochemical workstation.

### Calculated diffusion coefficient of sodium ions ( $D_{\text{Na}^+}$ )

The diffusion coefficients of sodium ions ( $D_{\text{Na}^+}$ ) in S@Ni-NCFs and S@NCFs electrodes can be calculated according to the following equations:

$$D_{\text{Na}^+} = D_{\text{Na}^+} = \left( \frac{2RT}{\sqrt{2}n^2F^2\sigma_wAC} \right)^2 = \frac{2R^2T^2}{n^2F^4\sigma_w^2A^2C^2} \quad (1)$$

$$Z' = R + \sigma_w \omega^{-1/2} \quad (2)$$

In equation (1), R, T, n, F, A, and C represent gas constant, absolute temperature, the number of electrons transferred per mole during oxidation, Faraday constant, effective area of work electrode, and  $\text{Na}^+$  concentration in cathode material, respectively. While in equation (2), R is a resistance parameter representing the combination of solution resistance and charge transfer resistance. From equation (1) and equation (2), it can be found that the  $D_{\text{Na}^+}$  is only associated with the value of  $\sigma$ , which can be obtained by plotting  $Z'$  vs.  $\omega^{-1/2}$  and the slop is  $\sigma$ .

## Supplementary Figureures

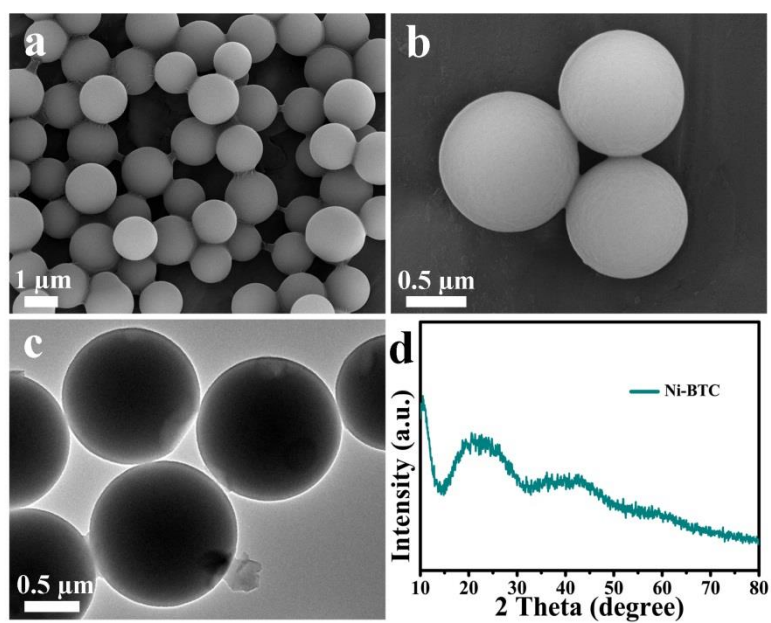

**Figure S1.** (a-b) FESEM, (c) TEM images and (d) XRD pattern of Ni-MOF

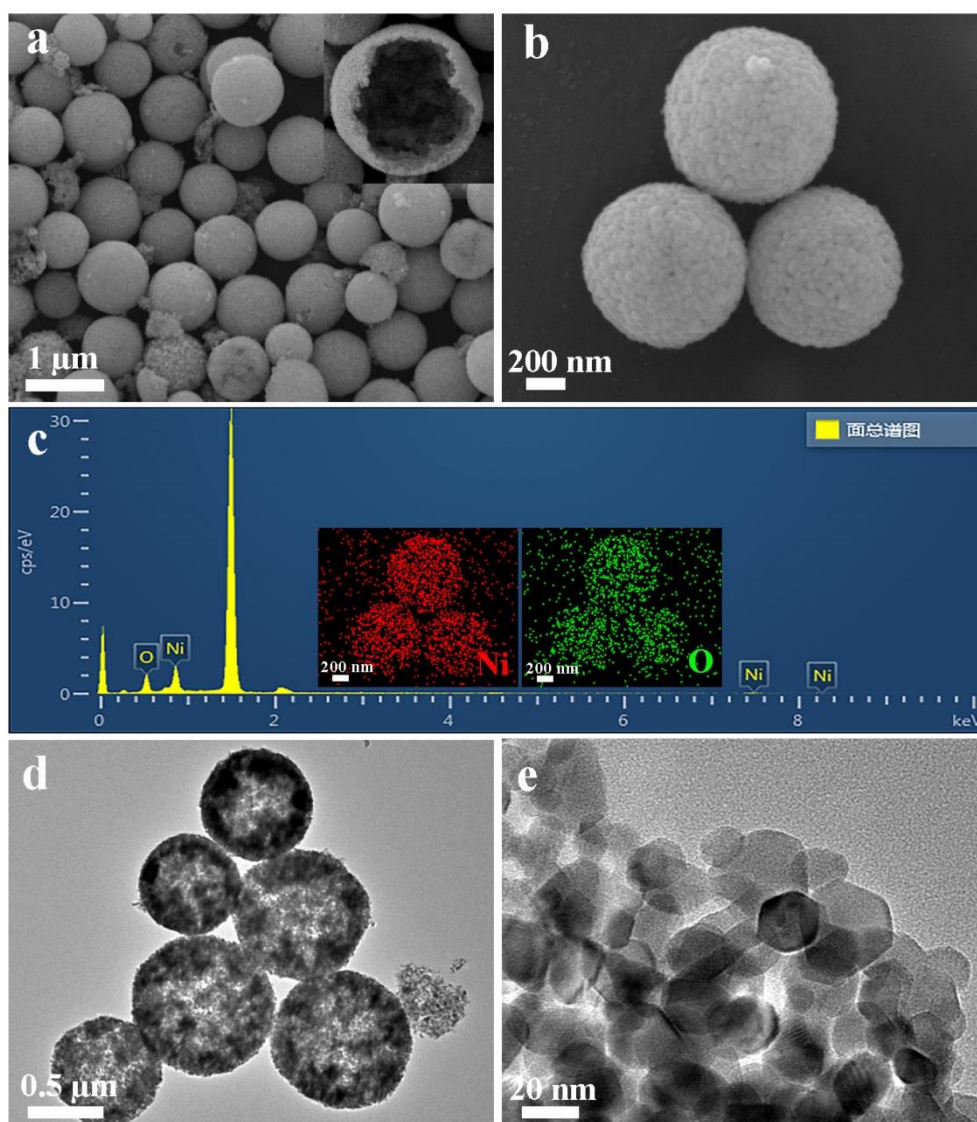

**Figure S2.** (a-b) FESEM images, (c) EDS spectrum and corresponding EDS mappings of NiO, (e) TEM and (f) HRTEM images of NiO hollow spheres

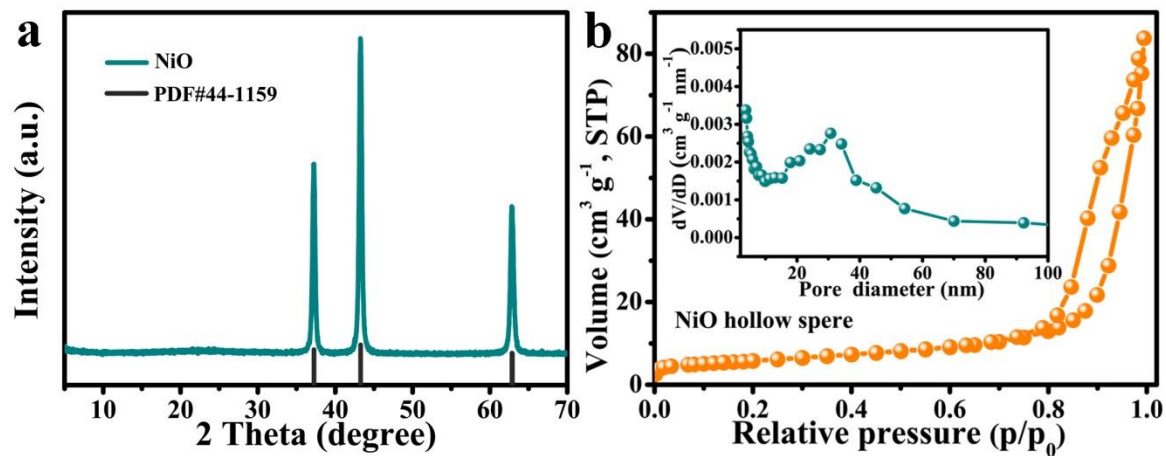

**Figure S3.** (a) XRD pattern, (b) N<sub>2</sub> adsorption and desorption and pore size distribution curves of NiO hollow spheres

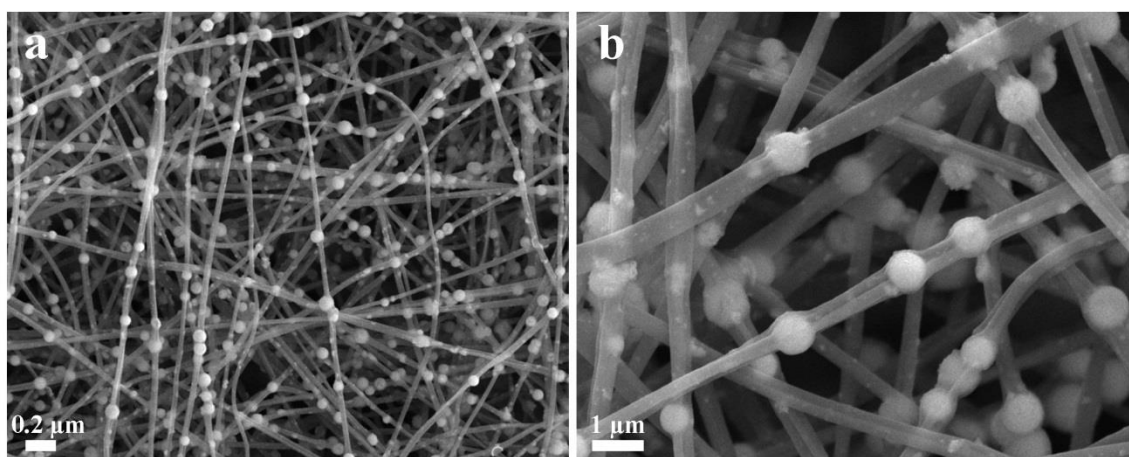

**Figure S4.** FESEM images of NiO-PAN fibers

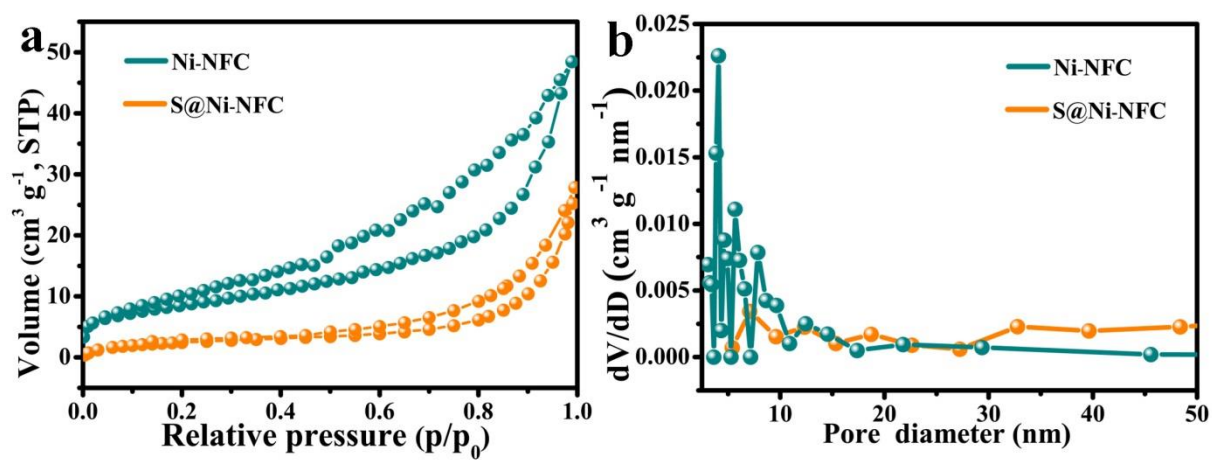

**Figure S5.** (a) N<sub>2</sub> adsorption/desorption curves and (b) pore size distribution curves of Ni-NFCs and S@Ni-NFCs composites.



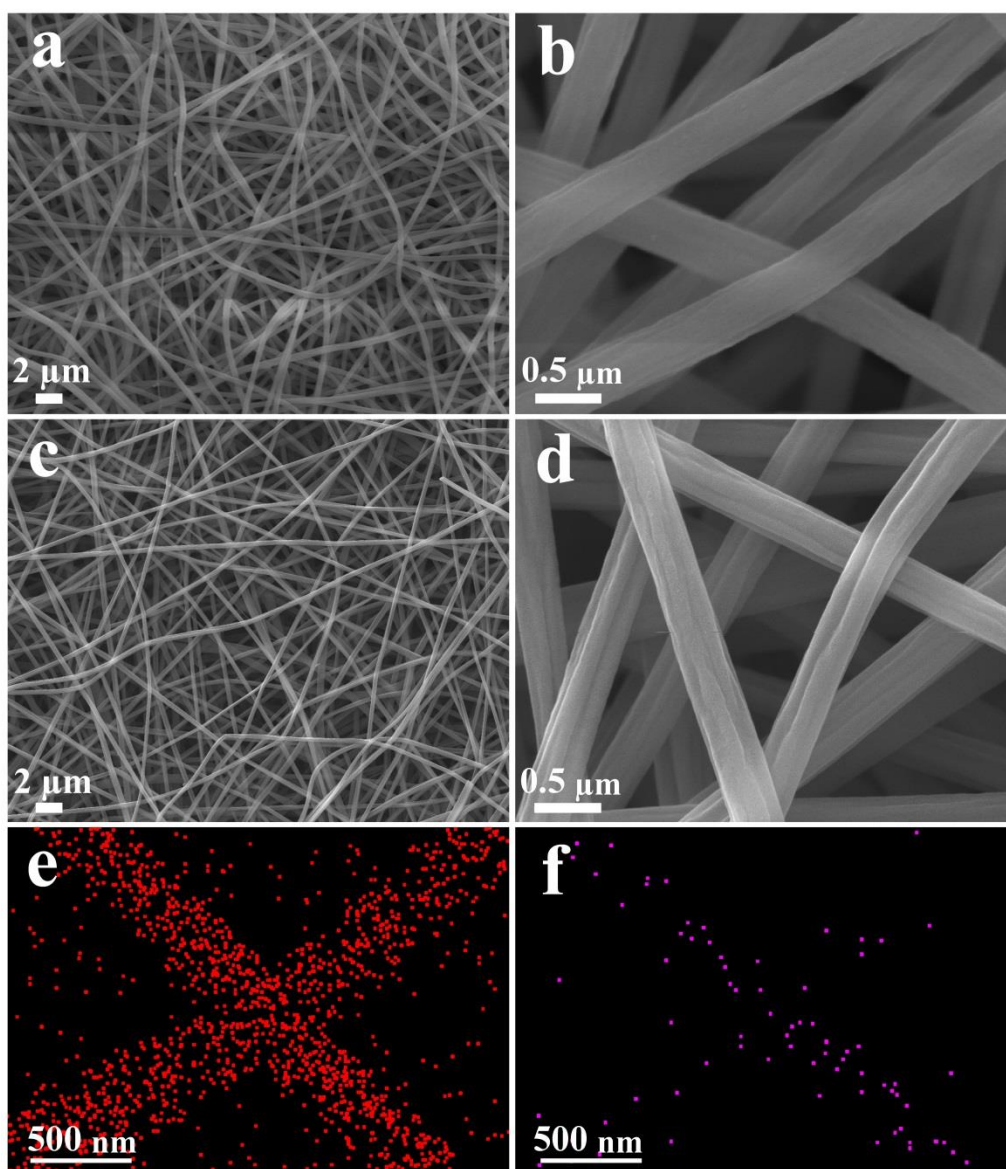

**Figure S6.** (a-b) FESEM images of PAN and (c-d) NCFs fibers, (e-f) EDS mappings of NCFs

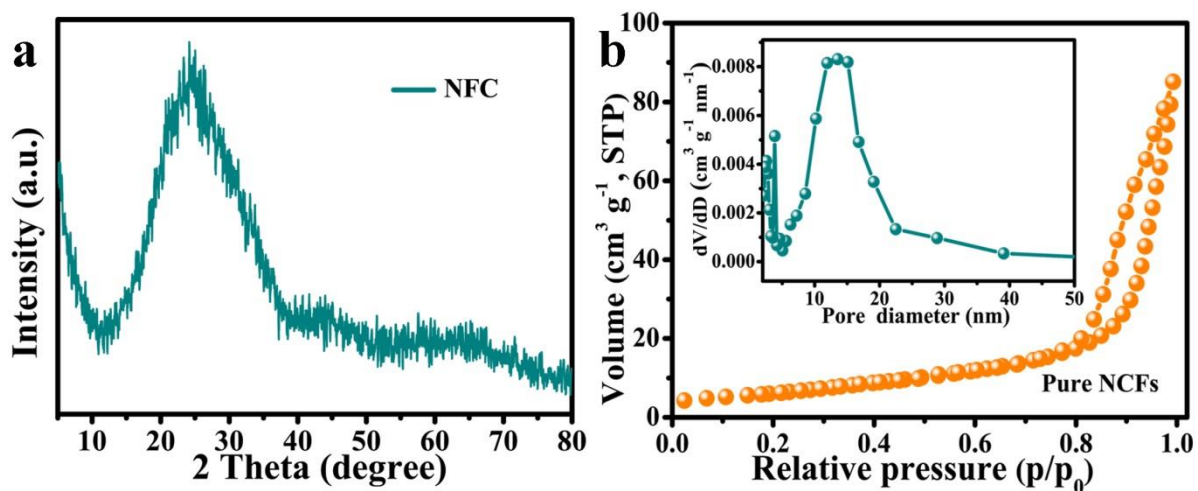

**Figure S7.** XRD pattern (b) N<sub>2</sub> adsorption and desorption and pore size distribution curves of NFCs fibers

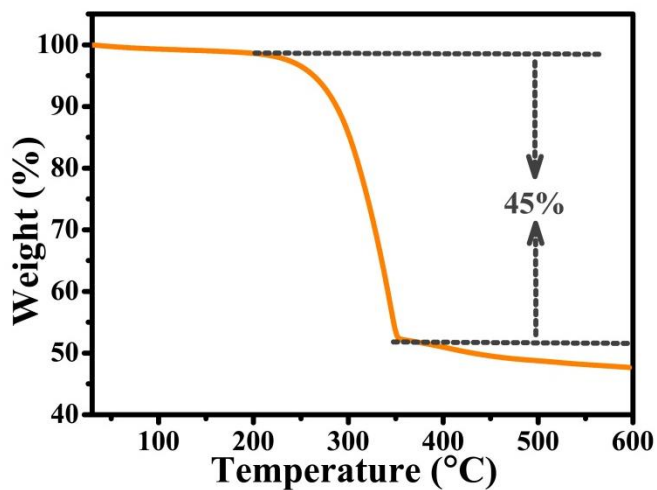

**Figure S8** The TGA curve of S@NCFs composite in the nitrogen atmosphere

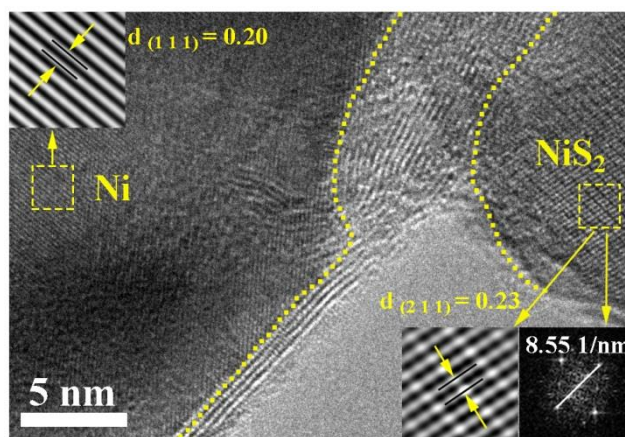

**Figure S9** HRTEM image of Ni-NCFs/S composite and the illustrations are lattice fringe and FFT image

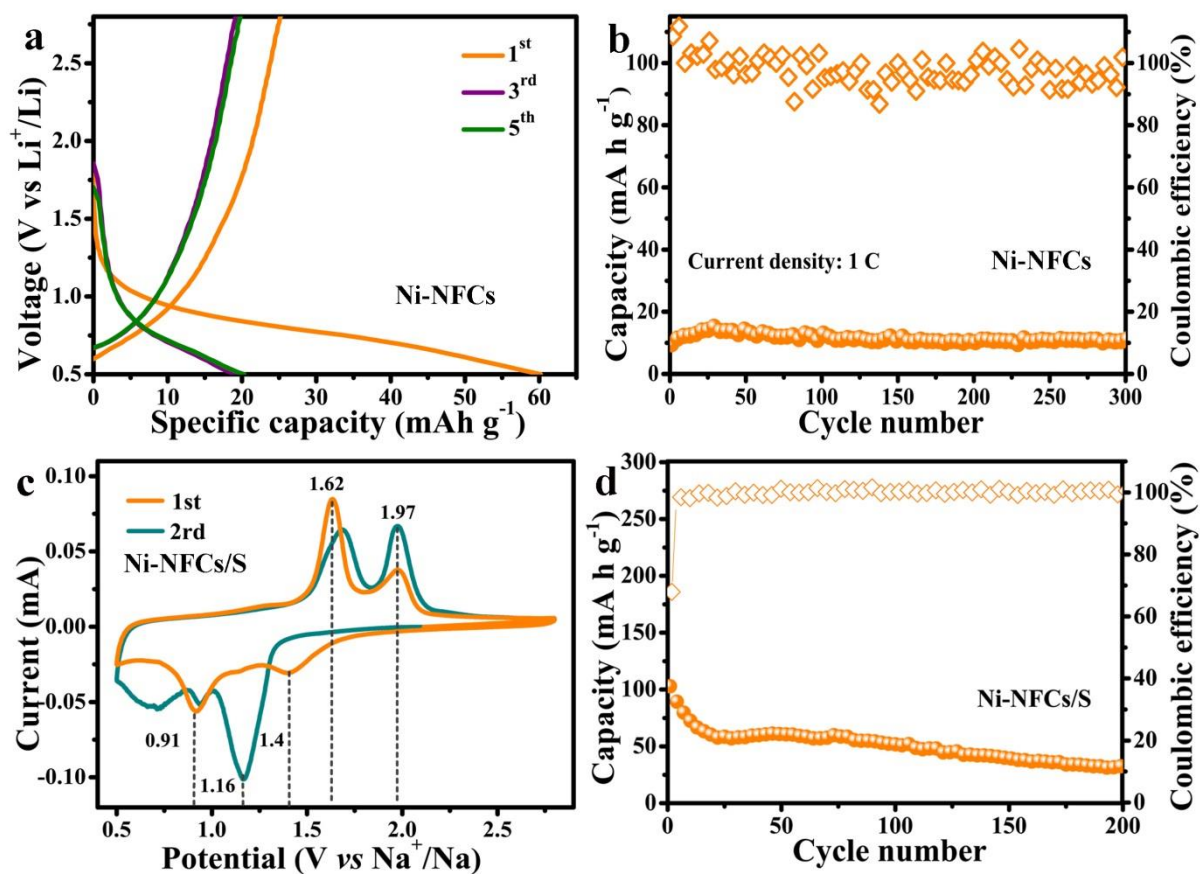

**Figure S10** (a) charge/discharge profiles and (b) cycling performance of Ni-NCFs at 1.0 C, (c) CV curve and (d) cycle performance of Ni-NCFs/S electrode at 0.5 C.

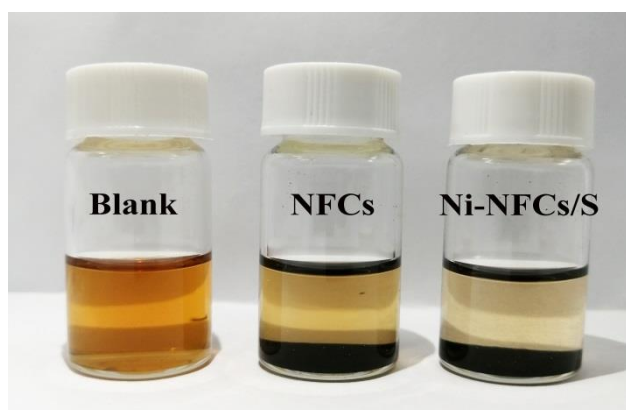

**Figure S11.** Static adsorption of  $\text{Na}_2\text{S}_6$  by NCFs and Ni-NCFs/S

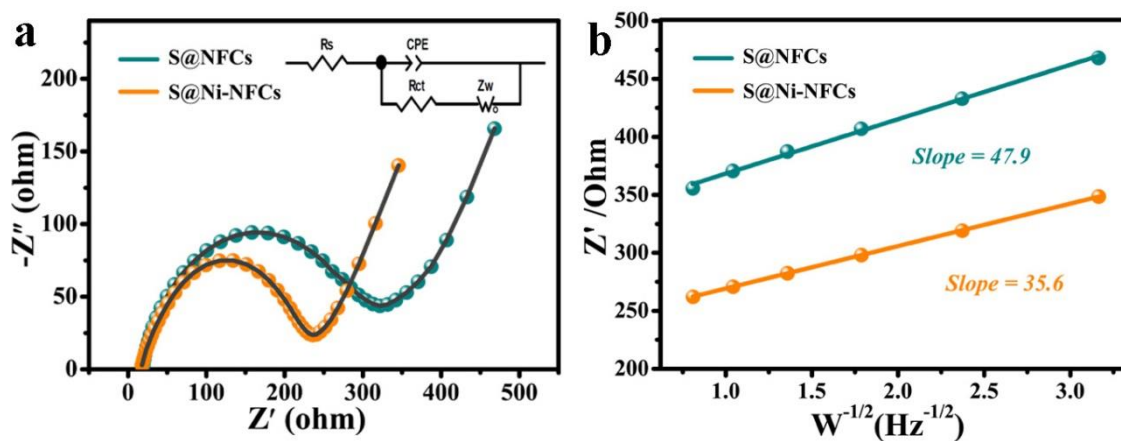

**Figure S12.** (a) EIS spectra at the open-circuit voltage before initial discharging (inset is the equivalent electrical circuit), (b) reciprocal square root of angular frequency ( $\omega^{-1/2}$ ) dependence of the real impedance ( $Z'$ ) in the low frequency of S@Ni-NCFs and S@NCFs electrodes

**Table S1.** Fitting parameters of  $\text{Na}_2\text{S}_6$  symmetric cells, S@Ni-NCFs and S@NCFs electrodes

| Cell/Sample                             | $R_s$ ( $\Omega$ ) | $R_{ct}$ ( $\Omega$ ) | $Z_w$ ( $\Omega$ ) |
|-----------------------------------------|--------------------|-----------------------|--------------------|
| S@NCFs                                  | 18.0               | 261.1                 | 258.9              |
| S@Ni-NCFs                               | 17.66              | 195.9                 | 59.66              |
| NCFs with $\text{Na}_2\text{S}_6$       | 15                 | 760.6                 | 500.4              |
| Ni-NCFs with $\text{Na}_2\text{S}_6$    | 12.9               | 145.7                 | 161.4              |
| Ni-NCFs without $\text{Na}_2\text{S}_6$ | 38.9               | 624.3                 | 740.2              |

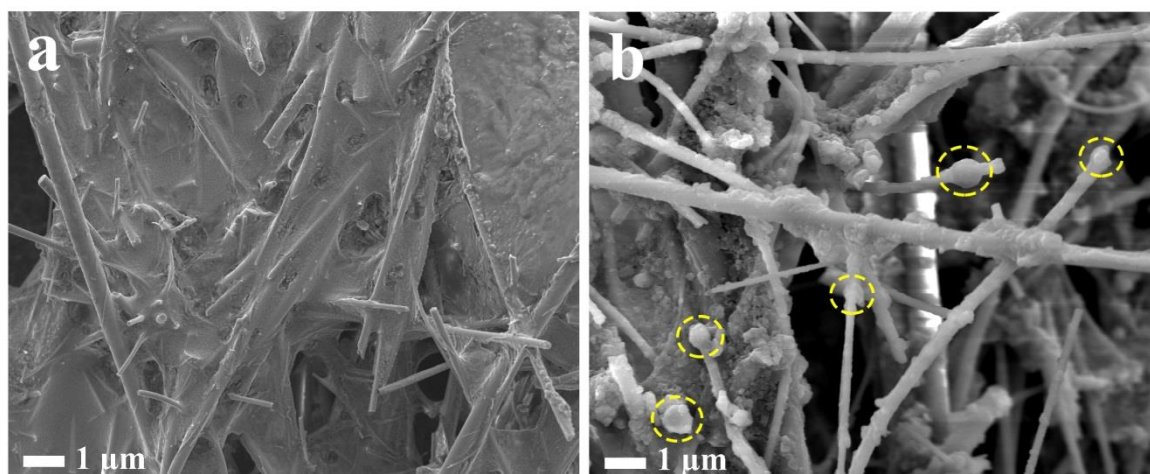**Figure S13.** The FESEM images of (a) S@NCFs and (b) S@Ni-NCFs composites after cycling

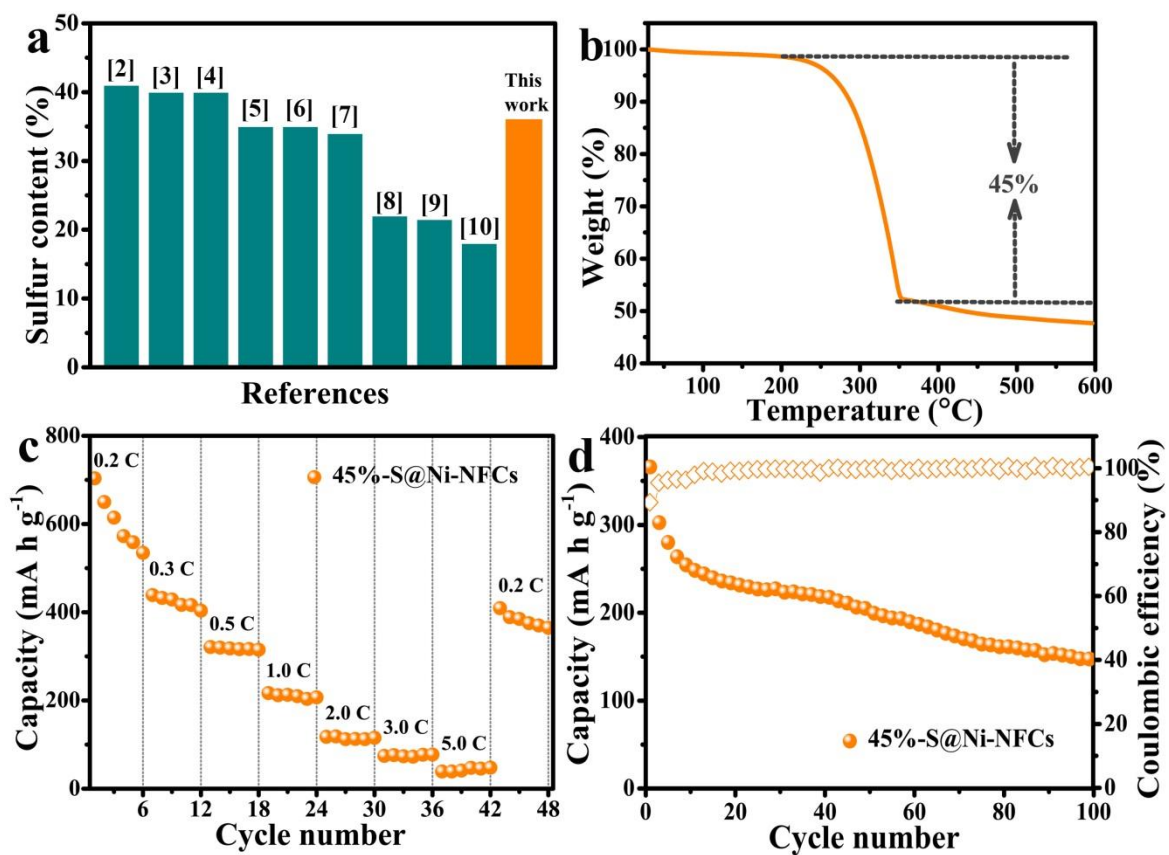

**Figure S14** (a) Comparison the sulfur content of this work with the literature (b) TGA curve, (c) rate capability and (d) cycling performance of of S@Ni-NFCs with higher sulfur loading.

Table S2. The comparisons of cathode materials for RT Na-S batteries

| Samples                                                             | S wt. %                 | Electrolyte                                                           | Rate                   | Cycle number | Decay rate (per cycle)                                      |
|---------------------------------------------------------------------|-------------------------|-----------------------------------------------------------------------|------------------------|--------------|-------------------------------------------------------------|
| S@Ni-NCFs                                                           | 36                      | 1 M NaClO <sub>4</sub> in TEGDME                                      | 0.5 C                  | 270          | 0.17 %                                                      |
| PCMs-S <sup>[12]</sup>                                              | 34                      | 1M NaClO <sub>4</sub> in PC/EC + 5 wt% FEC                            | 100 mA g <sup>-1</sup> | 350          | 0.17 %                                                      |
| SPAN <sup>[7]</sup>                                                 | 41                      | 1 M NaPF <sub>6</sub> in EC/DEC                                       | 0.1 C                  | 200          | 0.11 %                                                      |
| Sulfur infiltrated spheres (S@C) <sup>[6]</sup>                     | 35                      | 1 M NaPF <sub>6</sub> + 0.25M NaNO <sub>3</sub> in TEGDME             | 1 C                    | 1500         | 0.016 %                                                     |
| CFC/S <sup>[11]</sup>                                               | 24.4                    | 1.5 M NaClO <sub>4</sub> + 0.2 M NaNO <sub>3</sub> in TEGDME          | 0.1                    | 300          | 0.23 %                                                      |
| cZIF-8/S <sup>[12]</sup>                                            | 50 %                    | 1 M NaClO <sub>4</sub> in TEGDME                                      | 0.2 C                  | 250          | 0.17 %                                                      |
| CC@MnO <sub>2</sub> /Na <sub>2</sub> S <sub>6</sub> <sup>[13]</sup> | 0.5 mg cm <sup>-2</sup> | 1.5 M NaClO <sub>4</sub> + 0.2 M NaNO <sub>3</sub> in TEGDME          | 0.2 A g <sup>-1</sup>  | 500          | 0.15 % at 200 <sup>th</sup><br>0.023 % at 500 <sup>th</sup> |
| Thioether bond functionalized carbon (SC) <sup>[9]</sup>            | 21.5 %                  | 1 M NaClO <sub>4</sub> +PC+FEC                                        | 100 mA g <sup>-1</sup> | 800          | /                                                           |
| S@iMCHS <sup>[14]</sup>                                             | 46 %                    | 1.0 M NaClO <sub>4</sub> + PC/EC + 5 wt % FEC                         | 100 mA g <sup>-1</sup> | 200          | 0.056 %                                                     |
| micoporous carbon/sulfur MCPS <sup>[15]</sup>                       | 47 %                    | 1 M NaClO <sub>4</sub> +EC/DEC +SiO <sub>2</sub> -IL-ClO <sub>4</sub> | 0.5 C                  | 100          | 0.31 %                                                      |

## References

- [1] Liu, T., Jia, M., Zhang, Y., Han, J., Li, Y., Bao, S., D. Y. Liu, J. Jiang, M. W. Xu, *J. Power Sources* **2017**, *341*, 53-59.
- [2] I. Kim, C. H. Kim, S. Choi, J. P. Ahn, J. H. Ahn, K. W. Kim, E. J. Cairns, H. J. Ahn, *J. Power Sources* **2016**, *307*, 31-37.
- [3] W. Y. Du, Y. K. Wu, T. T. Yang, B. S. Guo, D. Y. Liu, S. J. Bao, M. W. Xu, *Chem. Eng. J.* **2020**, *379*, 122359.
- [4] B. W. Zhang, T. Sheng, Y. X. Wang, S. Chou, K. Davey, S. X. Dou, S. Z. Qiao, *Angew. Chem.-Int. Edit.* **2019**, *131*, 1498-1502.
- [5] T. T. Yang, W. Gao, B. S. Guo, R. M. Zhan, Q. J. Xu, , X. Y. Li, Y. M. Chen, M. W. Xu, *J. Mater. Chem. A* **2019**, *7*, 150-156.
- [6] R. Carter, L. Oakes, A. Douglas, N. Muralidharan, A. P. Cohn, C. L. Pint, *Nano Lett.* **2017**, *17*, 1863-1869.
- [7] L. Zhang, B. Zhang, Y. Dou, Y. Wang, M. Al-Mamun, X. Hu, H. Liu, *ACS Appl. Mater. Inter.* **2018**, *10*, 20422-20428.
- [8] T. H. Hwang, D. S. Jung, J. S. Kim, B. G. Kim, J. W. Choi, *Nano Lett.* **2013**, *13*, 4532-4538.
- [9] K. J. Chen, H. J. Li, Y. Xu, K. Liu, H. Li, X. W. Xu, X. Q. Qiu, M. Liu, *Nanoscale* **2019**, *11*, 5967-5973.
- [10] L. Fan, R. Ma, Y. Yang, S. Chen, B. Lu, *Nano Energy* **2016**, *28*, 304-310.
- [11] Q.-Q. Lu, X.-Y. Wang, J. Cao, C. Chen, K. Chen, Z.-F. Zhao, Z.-Q. Niu, J. Chen, *Energy Storage Mater.* **2017**, *8*, 77.
- [12] Y. M. Chen, W. F. Liang, S. Li, F. Zou, S. M. Bhaway, Z. Qiang, M. Gao, B. D. Vogt, Y. Zhu, *J. Mater. Chem. A* **2016**, *4*, 12471-12478.
- [13] A. Kumar, A. Ghosh, A. Roy, M. R. Panda, M. Forsyth, D. R. MacFarlane, S. Mitra, *Energy Storage Mater.* **2019**, *20*, 196-202.



[14] Y. -X. Wang, J. P. Yang, W. H. Lai, S. -L. Chou, Q. -F. Gu, H. K. Liu,,D. Y. Zhao, S. X. Dou, *J. Am. Soc.* **2016**, *138*, 16576-16579.

[15] S. Y. Wei, S. M. Xu, A. Agrawal, S. Choudhury, Y. Y. Lu, Z. Y. Tu, L. A. Archer, *Nat. Commun.* **2016**, *7*, 11722.
